# Supplementary material for: On springtails (Hexapoda: Collembola): a morphofunctional study of the jumping apparatus
Source: PubMed Central journal article supplement (PMC9336013; doi:10.1186/s12983-022-00463-y), 2022-07-29

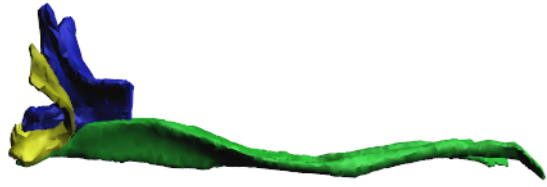

Supplement: 12983_2022_463_MOESM1_ESM.pdf [file 12983_2022_463_MOESM1_ESM.pdf]
